# Supplementary material for: Derivation of genetic interaction networks from quantitative phenotype data
Source: Springer Nature journal article supplement (doi:10.1186/gb-2005-6-4-r38), 2005-03-31
Supplement: Additional file 1 [file gb-2005-6-4-r38-s1.pdf]

**Additional data file 1. 75 genetic-interaction inequalities in 9 modes of genetic interaction.**

| <b>Inequality</b> | <b>Mode</b>    | <b>Asymmetry<sup>a</sup></b> |
|-------------------|----------------|------------------------------|
| A=AB<WT=B         | noninteractive |                              |
| B=AB<WT=A         | noninteractive |                              |
| WT=A<B=AB         | noninteractive |                              |
| WT=B<A=AB         | noninteractive |                              |
| WT=A=B=AB         | noninteractive |                              |
| AB<WT=A=B         | synthetic      |                              |
| WT=A=B<AB         | synthetic      |                              |
| A=B=AB<WT         | asynthetic     |                              |
| WT<A=B=AB         | asynthetic     |                              |
| A<WT=B=AB         | suppressive    | A ← B                        |
| B<WT=A=AB         | suppressive    | A → B                        |
| WT=A=AB<B         | suppressive    | A → B                        |
| WT=B=AB<A         | suppressive    | A ← B                        |
| A<B=AB<WT         | epistatic      | A ← B                        |
| B<A=AB<WT         | epistatic      | A → B                        |
| A=AB<B<WT         | epistatic      | A → B                        |
| B=AB<A<WT         | epistatic      | A ← B                        |
| A<WT<B=AB         | epistatic      | A ← B                        |
| B<WT<A=AB         | epistatic      | A → B                        |
| A=AB<WT<B         | epistatic      | A → B                        |
| B=AB<WT<A         | epistatic      | A ← B                        |
| WT<A<B=AB         | epistatic      | A ← B                        |
| WT<B<A=AB         | epistatic      | A → B                        |
| WT<A=AB<B         | epistatic      | A → B                        |
| WT<B=AB<A         | epistatic      | A ← B                        |
| WT=A<AB<B         | conditional    | A ← B                        |
| WT=B<AB<A         | conditional    | A → B                        |
| WT=A<B<AB         | conditional    | A ← B                        |
| WT=B<A<AB         | conditional    | A → B                        |
| A<WT=B<AB         | conditional    | A → B                        |
| B<WT=A<AB         | conditional    | A ← B                        |
| AB<WT=A<B         | conditional    | A ← B                        |
| AB<WT=B<A         | conditional    | A → B                        |
| A<AB<WT=B         | conditional    | A → B                        |
| B<AB<WT=A         | conditional    | A ← B                        |
| AB<A<WT=B         | conditional    | A → B                        |
| AB<B<WT=A         | conditional    | A ← B                        |
| A<AB<WT<B         | additive       |                              |
| B<AB<WT<A         | additive       |                              |
| A<WT<AB<B         | additive       |                              |
| B<WT<AB<A         | additive       |                              |

|           |                     |       |
|-----------|---------------------|-------|
| A<WT=AB<B | additive            |       |
| B<WT=AB<A | additive            |       |
| AB<A<B<WT | additive            |       |
| AB<B<A<WT | additive            |       |
| WT<A<B<AB | additive            |       |
| WT<B<A<AB | additive            |       |
| AB<A=B<WT | additive            |       |
| WT<A=B<AB | additive            |       |
| A<AB<B<WT | single-nonmonotonic | A ← B |
| B<AB<A<WT | single-nonmonotonic | A → B |
| A<WT<B<AB | single-nonmonotonic | A → B |
| B<WT<A<AB | single-nonmonotonic | A ← B |
| AB<A<WT<B | single-nonmonotonic | A ← B |
| AB<B<WT<A | single-nonmonotonic | A → B |
| WT<A<AB<B | single-nonmonotonic | A → B |
| WT<B<AB<A | single-nonmonotonic | A ← B |
| A<B<AB<WT | double-nonmonotonic |       |
| B<A<AB<WT | double-nonmonotonic |       |
| A<B<WT<AB | double-nonmonotonic |       |
| B<A<WT<AB | double-nonmonotonic |       |
| A<B<WT=AB | double-nonmonotonic |       |
| B<A<WT=AB | double-nonmonotonic |       |
| A=B<AB<WT | double-nonmonotonic |       |
| A=B<WT<AB | double-nonmonotonic |       |
| A=B<WT=AB | double-nonmonotonic |       |
| AB<WT<A<B | double-nonmonotonic |       |
| AB<WT<B<A | double-nonmonotonic |       |
| AB<WT<A=B | double-nonmonotonic |       |
| WT<AB<A<B | double-nonmonotonic |       |
| WT<AB<B<A | double-nonmonotonic |       |
| WT<AB<A=B | double-nonmonotonic |       |
| WT=AB<A<B | double-nonmonotonic |       |
| WT=AB<B<A | double-nonmonotonic |       |
| WT=AB<A=B | double-nonmonotonic |       |

---

<sup>a</sup> Blank table fields indicate symmetric interactions. Arrows indicate a conventional representation of asymmetry. These conventions are used in visual representations throughout this work.
