# Supplementary material for: Derivation of genetic interaction networks from quantitative phenotype data
Source: Springer Nature journal article supplement (doi:10.1186/gb-2005-6-4-r38), 2005-03-31
Supplement: Additional file 2 [file gb-2005-6-4-r38-s2.pdf]

**Additional data file 2. Gene perturbations used in this study.**

| <b>Allele<sup>a</sup></b>  | <b>Gene</b>  | <b>Locus</b>   | <b>Allele Form</b> |
|----------------------------|--------------|----------------|--------------------|
| <i>pbs2::bcKanMX4</i>      | <i>PBS2</i>  | <i>YJL128C</i> | null               |
| <i>sfl1::bcKanMX4</i>      | <i>SFL1</i>  | <i>YOR140W</i> | null               |
| <i>hsl1::bcKanMX4</i>      | <i>HSL1</i>  | <i>YKL101W</i> | null               |
| <i>ipk1::bcKanMX4</i>      | <i>IPK1</i>  | <i>YDR315C</i> | null               |
| <i>ira2::bcKanMX4</i>      | <i>IRA2</i>  | <i>YOL081W</i> | null               |
| <i>hog1::bcKanMX4</i>      | <i>HOG1</i>  | <i>YLR113W</i> | null               |
| <i>RAS2A22</i>             | <i>RAS2</i>  | <i>YNL098C</i> | dominant-negative  |
| <i>RSR1N16</i>             | <i>RSR1</i>  | <i>YGR152C</i> | dominant-negative  |
| <i>KSS1K42R</i>            | <i>KSS1</i>  | <i>YGR040W</i> | dominant-negative  |
| <i>STE11-4</i>             | <i>STE11</i> | <i>YLR362W</i> | dominant-active    |
| <i>TEC1<sup>+</sup>mc</i>  | <i>TEC1</i>  | <i>YBR083W</i> | gain-of-function   |
| <i>CDC42<sup>+</sup>mc</i> | <i>CDC42</i> | <i>YLR229C</i> | gain-of-function   |
| <i>FLO8<sup>+</sup>mc</i>  | <i>FLO8</i>  | <i>YER109C</i> | gain-of-function   |
| <i>STE20<sup>+</sup>mc</i> | <i>STE20</i> | <i>YHL007C</i> | gain-of-function   |
| <i>STE12<sup>+</sup>mc</i> | <i>STE12</i> | <i>YHR084W</i> | gain-of-function   |
| <i>PHD1<sup>+</sup>mc</i>  | <i>PHD1</i>  | <i>YKL043W</i> | gain-of-function   |
| <i>MSN1<sup>+</sup>mc</i>  | <i>MSN1</i>  | <i>YOL116W</i> | gain-of-function   |
| <i>GLN3<sup>+</sup>mc</i>  | <i>GLN3</i>  | <i>YER040W</i> | gain-of-function   |
| <i>BEM1<sup>+</sup>mc</i>  | <i>BEM1</i>  | <i>YBR200W</i> | gain-of-function   |
| <i>dig2::bcKanMX4</i>      | <i>DIG2</i>  | <i>YDR480W</i> | null               |
| <i>tec1::bcKanMX4</i>      | <i>TEC1</i>  | <i>YBR083W</i> | null               |
| <i>flo1::bcKanMX4</i>      | <i>FLO1</i>  | <i>YAR050W</i> | null               |
| <i>clb1::bcKanMX4</i>      | <i>CLB1</i>  | <i>YGR108W</i> | null               |
| <i>yer124c::bcKanMX4</i>   | <i>DSE1</i>  | <i>YER124C</i> | null               |
| <i>gpr1::bcKanMX4</i>      | <i>GPR1</i>  | <i>YDL035C</i> | null               |
| <i>pcl1::bcKanMX4</i>      | <i>PCL1</i>  | <i>YNL289W</i> | null               |
| <i>tpk1::bcKanMX4</i>      | <i>TPK1</i>  | <i>YJL164C</i> | null               |
| <i>cln1::bcKanMX4</i>      | <i>CLN1</i>  | <i>YMR199W</i> | null               |
| <i>fkh1::bcKanMX4</i>      | <i>FKH1</i>  | <i>YIL131C</i> | null               |
| <i>cts1::bcKanMX4</i>      | <i>CTS1</i>  | <i>YLR286C</i> | null               |
| <i>dbr1::bcKanMX4</i>      | <i>DBR1</i>  | <i>YKL149C</i> | null               |
| <i>fkh2::bcKanMX4</i>      | <i>FKH2</i>  | <i>YNL068C</i> | null               |
| <i>mep2::bcKanMX4</i>      | <i>MEP2</i>  | <i>YNL142W</i> | null               |
| <i>flo11::bcKanMX4</i>     | <i>MUC1</i>  | <i>YIR019C</i> | null               |
| <i>rgs2::bcKanMX4</i>      | <i>RGS2</i>  | <i>YOR107W</i> | null               |
| <i>ash1::bcKanMX4</i>      | <i>ASH1</i>  | <i>YKL185W</i> | null               |
| <i>egt2::bcKanMX4</i>      | <i>EGT2</i>  | <i>YNL327W</i> | null               |
| <i>ras2::bcKanMX4</i>      | <i>RAS2</i>  | <i>YNL098C</i> | null               |
| <i>pde1::bcKanMX4</i>      | <i>PDE1</i>  | <i>YGL248W</i> | null               |
| <i>sok2::bcKanMX4</i>      | <i>SOK2</i>  | <i>YMR016C</i> | null               |
| <i>flo10::bcKanMX4</i>     | <i>FLO10</i> | <i>YKR102W</i> | null               |
| <i>ure2::bcKanMX4</i>      | <i>URE2</i>  | <i>YNL229C</i> | null               |
| <i>msn1::bcKanMX4</i>      | <i>MSN1</i>  | <i>YOL116W</i> | null               |

|                          |         |         |      |
|--------------------------|---------|---------|------|
| <i>sip4::bcKanMX4</i>    | SIP4    | YJL089W | null |
| <i>ipk1::bcKanMX4</i>    | IPK1    | YDR315C | null |
| <i>pry2::bcKanMX4</i>    | PRY2    | YKR013W | null |
| <i>sno1::bcKanMX4</i>    | SNO1    | YMR095C | null |
| <i>gpa2::bcKanMX4</i>    | GPA2    | YER020W | null |
| <i>pry3::bcKanMX4</i>    | PRY3    | YJL078C | null |
| <i>cla4::bcKanMX4</i>    | CLA4    | YNL298W | null |
| <i>rsc1::bcKanMX4</i>    | RCS1    | YGL071W | null |
| <i>rox1::bcKanMX4</i>    | ROX1    | YPR065W | null |
| <i>dfg16::bcKanMX4</i>   | DFG16   | YOR030W | null |
| <i>aga1::bcKanMX4</i>    | AGA1    | YNR044W | null |
| <i>msn5::bcKanMX4</i>    | MSN5    | YDR335W | null |
| <i>mss11::bcKanMX4</i>   | MSS11   | YMR164C | null |
| <i>cnb1::bcKanMX4</i>    | CNB1    | YKL190W | null |
| <i>pde2::bcKanMX4</i>    | PDE2    | YOR360C | null |
| <i>ent1::bcKanMX4</i>    | ENT1    | YDL161W | null |
| <i>isw1::bcKanMX4</i>    | ISW1    | YBR245C | null |
| <i>hms1::bcKanMX4</i>    | HMS1    | YOR032C | null |
| <i>gat4::bcKanMX4</i>    | GAT4    | YIR013C | null |
| <i>bmh1::bcKanMX4</i>    | BMH1    | YER177W | null |
| <i>rim9::bcKanMX4</i>    | RIM9    | YMR063W | null |
| <i>dia3::bcKanMX4</i>    | DIA3    | YDL024C | null |
| <i>bud6::bcKanMX4</i>    | BUD6    | YLR319C | null |
| <i>bni1::bcKanMX4</i>    | BN11    | YNL271C | null |
| <i>rsc1::bcKanMX4</i>    | RSC1    | YGR056W | null |
| <i>mep3::bcKanMX4</i>    | MEP3    | YPR138C | null |
| <i>mep1::bcKanMX4</i>    | MEP1    | YGR121C | null |
| <i>dia1::bcKanMX4</i>    | DIA1    | YMR316W | null |
| <i>pgu1::bcKanMX4</i>    | PGU1    | YJR153W | null |
| <i>cna1::bcKanMX4</i>    | CNA1    | YLR433C | null |
| <i>bud8::bcKanMX4</i>    | BUD8    | YLR353W | null |
| <i>ypl114w::bcKanMX4</i> | YPL114W | YPL114W | null |
| <i>ktr2::bcKanMX4</i>    | KTR2    | YKR061W | null |
| <i>tpk2::bcKanMX4</i>    | TPK2    | YPL203W | null |
| <i>ylr042c::bcKanMX4</i> | YLR042C | YLR042C | null |
| <i>yor225w::bcKanMX4</i> | YOR225W | YOR225W | null |
| <i>yel033w::bcKanMX4</i> | YEL033W | YEL033W | null |
| <i>spo12::bcKanMX4</i>   | SPO12   | YHR152W | null |
| <i>yps1::bcKanMX4</i>    | YPS1    | YLR120C | null |
| <i>ynl051w::bcKanMX4</i> | COG5    | YNL051W | null |
| <i>rim8::bcKanMX4</i>    | RIM8    | YGL045W | null |
| <i>ygr149w::bcKanMX4</i> | YGR149W | YGR149W | null |
| <i>yap1::bcKanMX4</i>    | YAP1    | YML007W | null |
| <i>ylr414c::bcKanMX4</i> | YLR414C | YLR414C | null |
| <i>ssa4::bcKanMX4</i>    | SSA4    | YER103W | null |
| <i>pam1::bcKanMX4</i>    | PAM1    | YDR251W | null |

|                          |         |         |      |
|--------------------------|---------|---------|------|
| <i>whi3::bcKanMX4</i>    | WHI3    | YNL197C | null |
| <i>ygr045c::bcKanMX4</i> | YGR045C | YGR045C | null |
| <i>rps0A::bcKanMX4</i>   | RPS0A   | YGR214W | null |
| <i>whi2::bcKanMX4</i>    | WHI2    | YOR043W | null |
| <i>sut1::bcKanMX4</i>    | SUT1    | YGL162W | null |
| <i>car2::bcKanMX4</i>    | CAR2    | YLR438W | null |
| <i>sph1::bcKanMX4</i>    | SPH1    | YLR313C | null |
| <i>yhr143w::bcKanMX4</i> | DSE2    | YHR143W | null |
| <i>ynl159c::bcKanMX4</i> | ASI2    | YNL159C | null |
| <i>bud4::bcKanMX4</i>    | BUD4    | YJR092W | null |
| <i>dfg5::bcKanMX4</i>    | DFG5    | YMR238W | null |
| <i>ime2::bcKanMX4</i>    | IME2    | YJL106W | null |
| <i>yol155c::bcKanMX4</i> | YOL155C | YOL155C | null |
| <i>kss1::bcKanMX4</i>    | KSS1    | YGR040W | null |
| <i>mid2::bcKanMX4</i>    | MID2    | YLR332W | null |
| <i>mga1::bcKanMX4</i>    | MGA1    | YGR249W | null |
| <i>ydl222c::bcKanMX4</i> | FMP45   | YDL222C | null |
| <i>tos11::bcKanMX4</i>   | YOR248W | YOR248W | null |
| <i>srl1::bcKanMX4</i>    | SRL1    | YOR247W | null |
| <i>yhr156c::bcKanMX4</i> | LIN1    | YHR156C | null |
| <i>yjl017w::bcKanMX4</i> | YJL017W | YJL017W | null |
| <i>xbp1::bcKanMX4</i>    | XBP1    | YIL101C | null |
| <i>yak1::bcKanMX4</i>    | YAK1    | YJL141C | null |
| <i>tpk3::bcKanMX4</i>    | TPK3    | YKL166C | null |
| <i>cln2::bcKanMX4</i>    | CLN2    | YPL256C | null |
| <i>pbs2::bcKanMX4</i>    | PBS2    | YJL128C | null |
| <i>ace2::bcKanMX4</i>    | ACE2    | YLR131C | null |
| <i>clb2::bcKanMX4</i>    | CLB2    | YPR119W | null |
| <i>mrp21::bcKanMX4</i>   | MRP21   | YBL090W | null |
| <i>rim13::bcKanMX4</i>   | RIM13   | YMR154C | null |
| <i>yjl142c::bcKanMX4</i> | YJL142C | YJL142C | null |
| <i>mks1::bcKanMX4</i>    | MKS1    | YNL076W | null |
| <i>mih1::bcKanMX4</i>    | MIH1    | YMR036C | null |
| <i>sfp1::bcKanMX4</i>    | SFP1    | YLR403W | null |
| <i>hmi1::bcKanMX4</i>    | HMI1    | YOL095C | null |
| <i>msm1::bcKanMX4</i>    | MSM1    | YGR171C | null |
| <i>hog1::bcKanMX4</i>    | HOG1    | YLR113W | null |
| <i>akr1::bcKanMX4</i>    | AKR1    | YDR264C | null |
| <i>gln3::bcKanMX4</i>    | GLN3    | YER040W | null |
| <i>hsl1::bcKanMX4</i>    | HSL1    | YKL101W | null |
| <i>snf1::bcKanMX4</i>    | SNF1    | YDR477W | null |
| <i>elm1::bcKanMX4</i>    | ELM1    | YKL048C | null |
| <i>sfl1::bcKanMX4</i>    | SFL1    | YOR140W | null |
| <i>yir002c::bcKanMX4</i> | MPH1    | YIR002C | null |
| <i>snf4::bcKanMX4</i>    | SNF4    | YGL115W | null |
| <i>cln3::bcKanMX4</i>    | CLN3    | YAL040C | null |

|                        |              |                |      |
|------------------------|--------------|----------------|------|
| <i>ira2::bcKanMX4</i>  | <i>IRA2</i>  | <i>YOL081W</i> | null |
| <i>vps25::bcKanMX4</i> | <i>VPS25</i> | <i>YJR102C</i> | null |
| <i>dia2::bcKanMX4</i>  | <i>DIA2</i>  | <i>YOR080W</i> | null |

---

<sup>a</sup> The first 19 mutant alleles were crossed against the remaining 119 deletion alleles. *bcKanMX4* indicates a “barcode” deletion-insertion allele. *mc* indicates the allele is borne on a multicopy plasmid.
