# Supplementary material for: Derivation of genetic interaction networks from quantitative phenotype data
Source: Springer Nature journal article supplement (doi:10.1186/gb-2005-6-4-r38), 2005-03-31
Supplement: Additional file 3 [file gb-2005-6-4-r38-s3.pdf]

### Additional data file 3

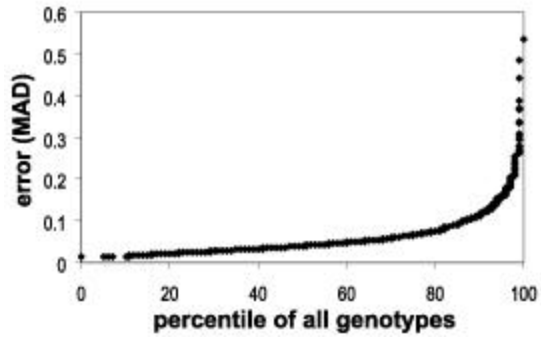

**Phenotype error values in the entire data set.** This plot shows the phenotype error values (median absolute deviation; see Materials and Methods) plotted against percentile of all genotypes ordered by error magnitude.
